# Supplementary material for: Accelerated 13C detection by concentrating the NMR sample in a biphasic solvent system
Source: Royal Society of Chemistry journal article supplement (doi:10.1039/d1an00470k), 2021-01-01
Supplement: d1an00470k1.pdf [file d1an00470k1.pdf]

## Supporting Information

### Accelerated $^{13}\text{C}$ detection by concentrating the NMR sample in biphasic solvent system.

Bikash Baishya<sup>a\*</sup>, Ajay Verma<sup>b</sup>, Rashmi Parihar<sup>a,c</sup>

<sup>a</sup>*Center of Biomedical Research (Formerly Centre of Biomedical Magnetic Resonance), SGPGIMS  
Campus, Raebareli Road, Lucknow, 226014, India*

<sup>b</sup>*Govt. Degree College, Tyuni, 248199, Dehradun, Uttarakhand.*

<sup>c</sup>*Department of Bioinformatics, Dr. A. P. J. Abdul Kalam Technical University, Lucknow-226021, U.P.*

SI Table 1: Parameter table: Acquisition and processing parameters for all the experiments Figure wise p2

Sample preparation: p4

Figure S1. Investigation of autoshimming in small samples 2.5 cm long p5

Figure S2. Investigation of autoshimming in biphasic samples 3 cm vs. small sample 2.5 cm p5

Figure S3. displays the comparison of  $^{13}\text{C}$  NMR (NOE enhanced  $^1\text{H}$  decoupled) spectra on a sample of cholesterol (5.1 mg) from 400 MHz spectrometer for various sample types p6

Figure S4. 2D  $^1\text{H}$ - $^{13}\text{C}$  HSQC spectra recorded on a sample of cholesterol (5.1 mg) using different sample types at 400 MHz using BBFO probe. P7

Figure S5. 2D  $^1\text{H}$ - $^1\text{H}$  TOCSY spectra on a sample of cholesterol (5.1mg) for different sample types p8

Figure S6. 2D  $^1\text{H}$ - $^1\text{H}$  COSY spectra on a sample of cholesterol (5.1 mg) on different sample types p9

Fig S7. 800 MHz full hsqc spectrum of S- $\text{CDCl}_3/\text{H}_2\text{O}$  symmetric cholesterol sample (5.1 mg) p10

Fig S7. 400 MHz full hsqc spectrum of S- $\text{CDCl}_3/\text{H}_2\text{O}$  symmetric cholesterol sample (5.1 mg) p11

Fig S7. 400 MHz full hsqc spectrum of U- $\text{CDCl}_3/\text{H}_2\text{O}$  symmetric cholesterol sample (5.1 mg) p12

Figure S8.  $^{13}\text{C}$  NMR spectra on second sample of cholesterol (5.9 mg) from 800 MHz for various sample types p13

Figure S8. HSQC spectra on second sample of cholesterol (5.9 mg) from 800 MHz for various sample types p14

**SI Table 1: Parameter table: Acquisition and processing parameters for all the experiments Figure wise**

**TD**=Time domain data size (For 2D TD2/TD1)

**DS**=dummy scan

**NS**=Number scan

**SW**=spectral width (For 2D SW2/SW1)

**AQ**=acquisition time(For 2D aq(t2)/aq(t1))

**RG**=Receiver gain

**O1P**=frequency offset (For 2D O2P/O1P)

**D1**=relaxation Delay

**SI**=zero filling (For 2D SI F2/F1)

**WDW**=Window function

**LB**=Line broadening

Pulse sequence for 2D mentioned with Figure

**AEOSP**=all experiment on same parameters

**SS**=slice selective

**SP**=single pulse

**SL**=Single Layer

|                                     | TD           | DS/NS | SW(p<br>pm) | AQ(s)               | RG       | O1P        | D1(<br>s) | SI     | WDW   | LB        |                |
|-------------------------------------|--------------|-------|-------------|---------------------|----------|------------|-----------|--------|-------|-----------|----------------|
| Fig. 2<br>400<br>MHz                | 65536        | 8/160 | 238         | 1.36                | 203      | 100        | 2         | 131072 | EM    | 1         | AEOSP          |
| Fig 3<br>800<br>MHz                 | 65536        | 8/256 | 238         | 0.681               | 203      | 100        | 2         | 131072 | EM    | 1         | AEOSP          |
| Fig 4<br>400<br>MHz                 | 22386        | 8/8   | 14          | 2                   | 80.<br>6 | 4.69       | 3         | 65536  | EM    | 0.3       | AEOSP          |
| Fig 5<br>800<br>MHz                 | 65786        | 8/8   | 20.55       | 2                   | 10       | 4.69       | 3         | 131072 | EM    | 0.3       | AEOSP          |
| Fig 6<br>800<br>MHz                 | 65536        | 4/360 | 238         | 0.681               | 203      | 100        | 2         | 131072 | EM    | 1         | AEOSP          |
| Fig 7<br>HSQC<br>ETGP<br>800<br>MHz | 2048/25<br>6 | 16/2  | 10/16<br>5  | 0.127<br>/0.00<br>4 | 203      | 5/74.<br>6 | 1.8       | 4k/512 | QSINE | 1/0.<br>3 | SSB 2<br>AEOSP |
| Fig S1<br>400<br>MHz                | 22386        | 1     | 14          | 2                   | 80.<br>6 | 4.69       | 3         | 65536  | EM    | 0.3       | AEOSP          |

|                                      |              |       |       |                      |          |      |     |        |       |           |                |
|--------------------------------------|--------------|-------|-------|----------------------|----------|------|-----|--------|-------|-----------|----------------|
| Fig S2<br>400<br>MHz                 | 22386        | 8/8   | 14    | 2                    | 80.<br>6 | 4.69 | 3   | 65536  | EM    | 0.3       | AEOSP          |
| Fig S3<br>400<br>MHz                 | 65536        | 4/400 | 238   | 1.36                 | 203      | 100  | 2   | 131072 | EM    | 1         | AEOSP          |
| Fig S4<br>HSQC<br>ETGP<br>400<br>MHz | 1200/19<br>2 | 8/2   | 8/145 | 0.187<br>/0.00<br>65 | 203      | 4/75 | 1.8 | 2k/512 | QSINE | 1/0.<br>3 | SSB 2<br>AEOSP |
| Fig S5<br>TOCS<br>Y<br>800<br>MHz    | 3072/16<br>0 | 8/8   | 8/8   | 0.240<br>/0.01<br>24 | 64       | 4/4  | 1.5 | 4k/256 | SINE  | 1/0.<br>3 | SSB 2<br>AEOSP |
| Fig S6<br>COSY<br>400<br>MHz         | 2048/25<br>6 | 16/1  | 8/8   | 0.320<br>/0.04       | 203      | 4/4  | 1.5 | 4k/512 | SINE  | 1/0.<br>3 | SSB 0<br>AEOSP |

**Sample preparation:** For strychnine sample 25 mg was dissolved in 1 ml CDCl<sub>3</sub> of which 0.2 ml was transferred to each of the four NMR tubes for the 4 cm standard (5 mm o.d.) sample, 3 c.m. single layer sample, and the two biphasic samples respectively. For cholesterol 35.5 mg was dissolved in 1.4 ml CDCl<sub>3</sub> of which 0.2 ml was transferred to each of the five NMR tube for the 4 cm standard (5 mm o.d.) sample, shigemi tube, 3 mm o.d. tube, and the two biphasic samples respectively. Similarly a second cholesterol sample was also prepared.

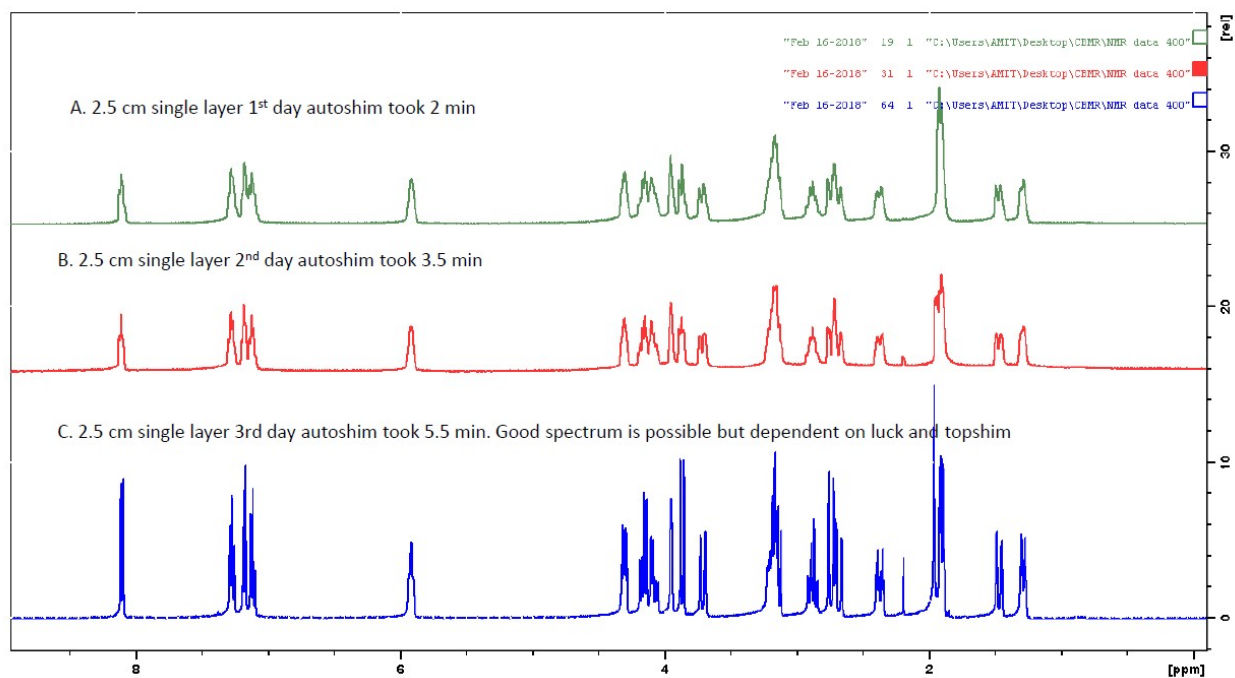

**Figure S1.** Investigation of autoshimming (topshim in bruker spectrometers) in small samples. The sample is 5 mg strychnine in  $\text{CDCl}_3$ . (A) Result of autoshim on 2.5 cm small sample on the 1<sup>st</sup> day. The procedure took 2 minutes and resulted in a poor  $^1\text{H}$  spectrum. (B) Result of autoshim on the same sample on the 2<sup>nd</sup> day. The procedure took 3.5 minutes and resulted in a poor  $^1\text{H}$  spectrum. (C) Result of autoshim on the same sample on the 3<sup>rd</sup> day. The procedure took 5.5 minutes and resulted in a reasonably good spectrum than the 1<sup>st</sup> two attempts.

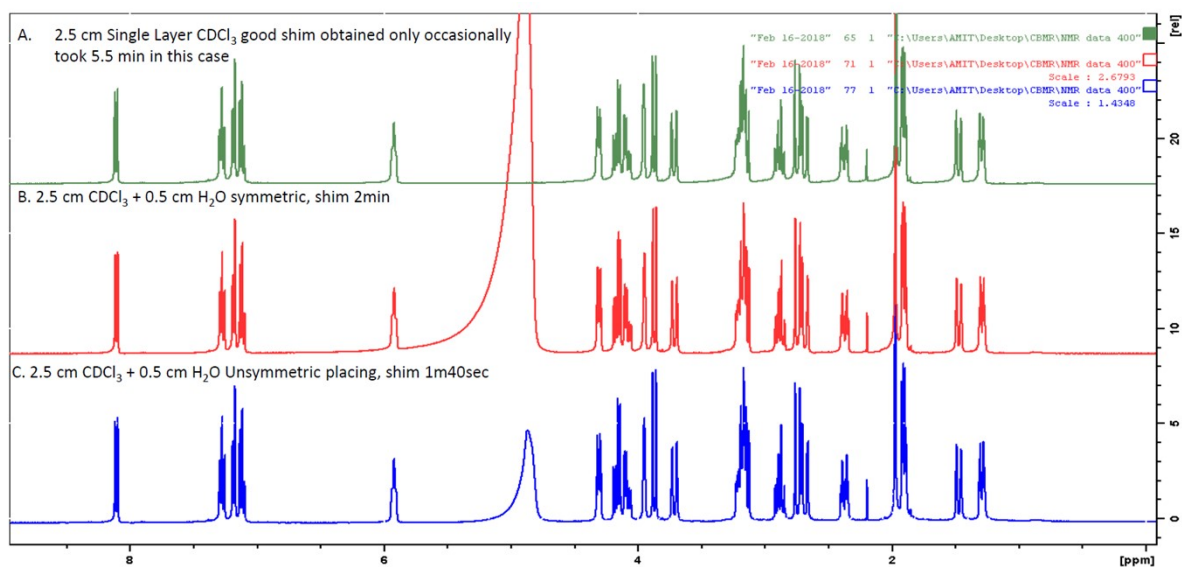

**Figure S2.** The comparison of shimming for biphasic (these are 3 cm sample) samples and single layer 2.5 cm  $\text{CDCl}_3$  sample. (A) Result of occasionally obtained good autoshim on 2.5 cm small sample taking 5.5 minutes (from S1C) (B) Result of autoshim on DLIS-S 2.5 cm  $\text{CDCl}_3$ +0.5 cm  $\text{D}_2\text{O}$  taking 2 minutes (C) Result of autoshim on DLIS-U 2.5 cm  $\text{CDCl}_3$ +0.5 cm  $\text{D}_2\text{O}$  taking 1 minute and 40 seconds. As the sample height increases, the distance to the air-liquid and solid-liquid interface also increases from the coil region resulting in less interference from field inhomogeneity.

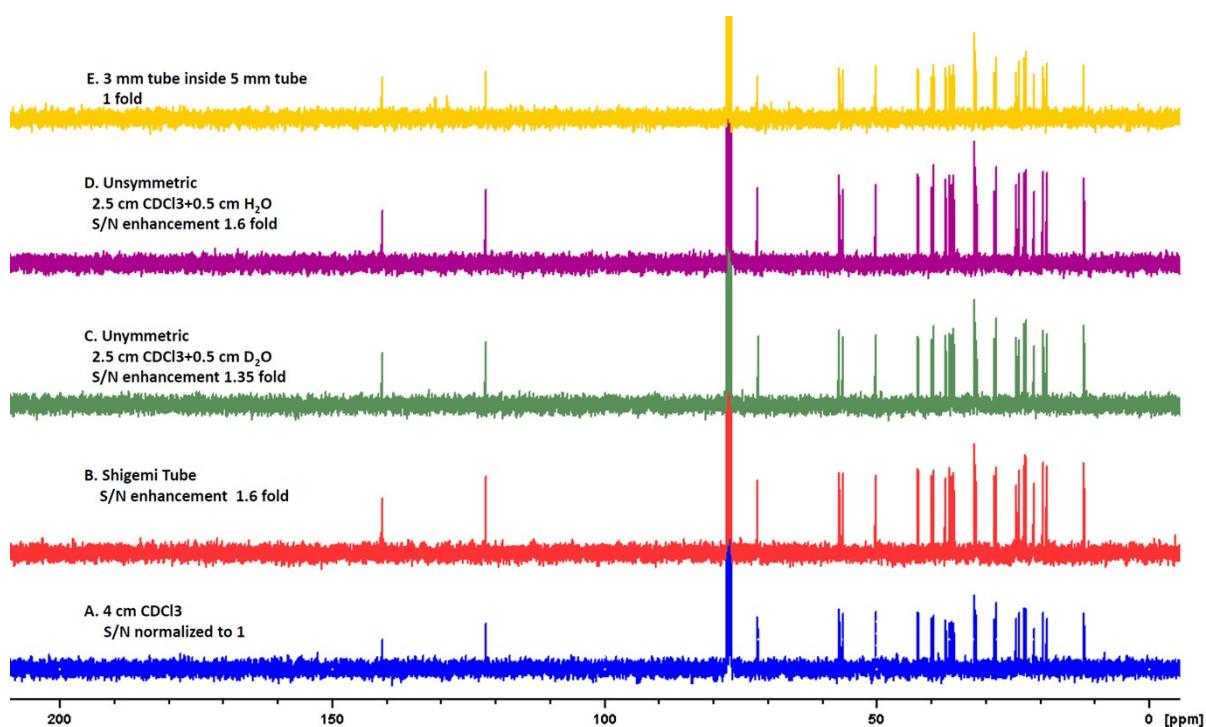

Figure S3. displays the comparison of  $^{13}\text{C}$  NMR (NOE enhanced  $^1\text{H}$  decoupled) spectra on a sample of cholesterol (5.1 mg) from 400 MHz spectrometer at the same noise level for various sample sizes (A) standard sample (4 cm), (B) Shigemi tube, (C) biphasic-S 3 cm (2.5 cm  $\text{CDCl}_3 + 0.5$  cm  $\text{D}_2\text{O}$ ), (D) biphasic-S 3 cm (2.5 cm  $\text{CDCl}_3 + 0.5$  cm  $\text{H}_2\text{O}$ ), and (E) 3 mm o.d. tube samples respectively. The SNR enhancement factors were 1.6 (shigemi tube), 1.35 ( $\text{CDCl}_3/\text{D}_2\text{O}$ ), 1.6 ( $\text{CDCl}_3/\text{H}_2\text{O}$ ), and 1.1 (3 mm tube) fold respectively relative to that of 4 cm standard sample. All spectra were acquired with the same acquisition and processing parameters. All experiments were carried out at 400 MHz using BBFO probe.

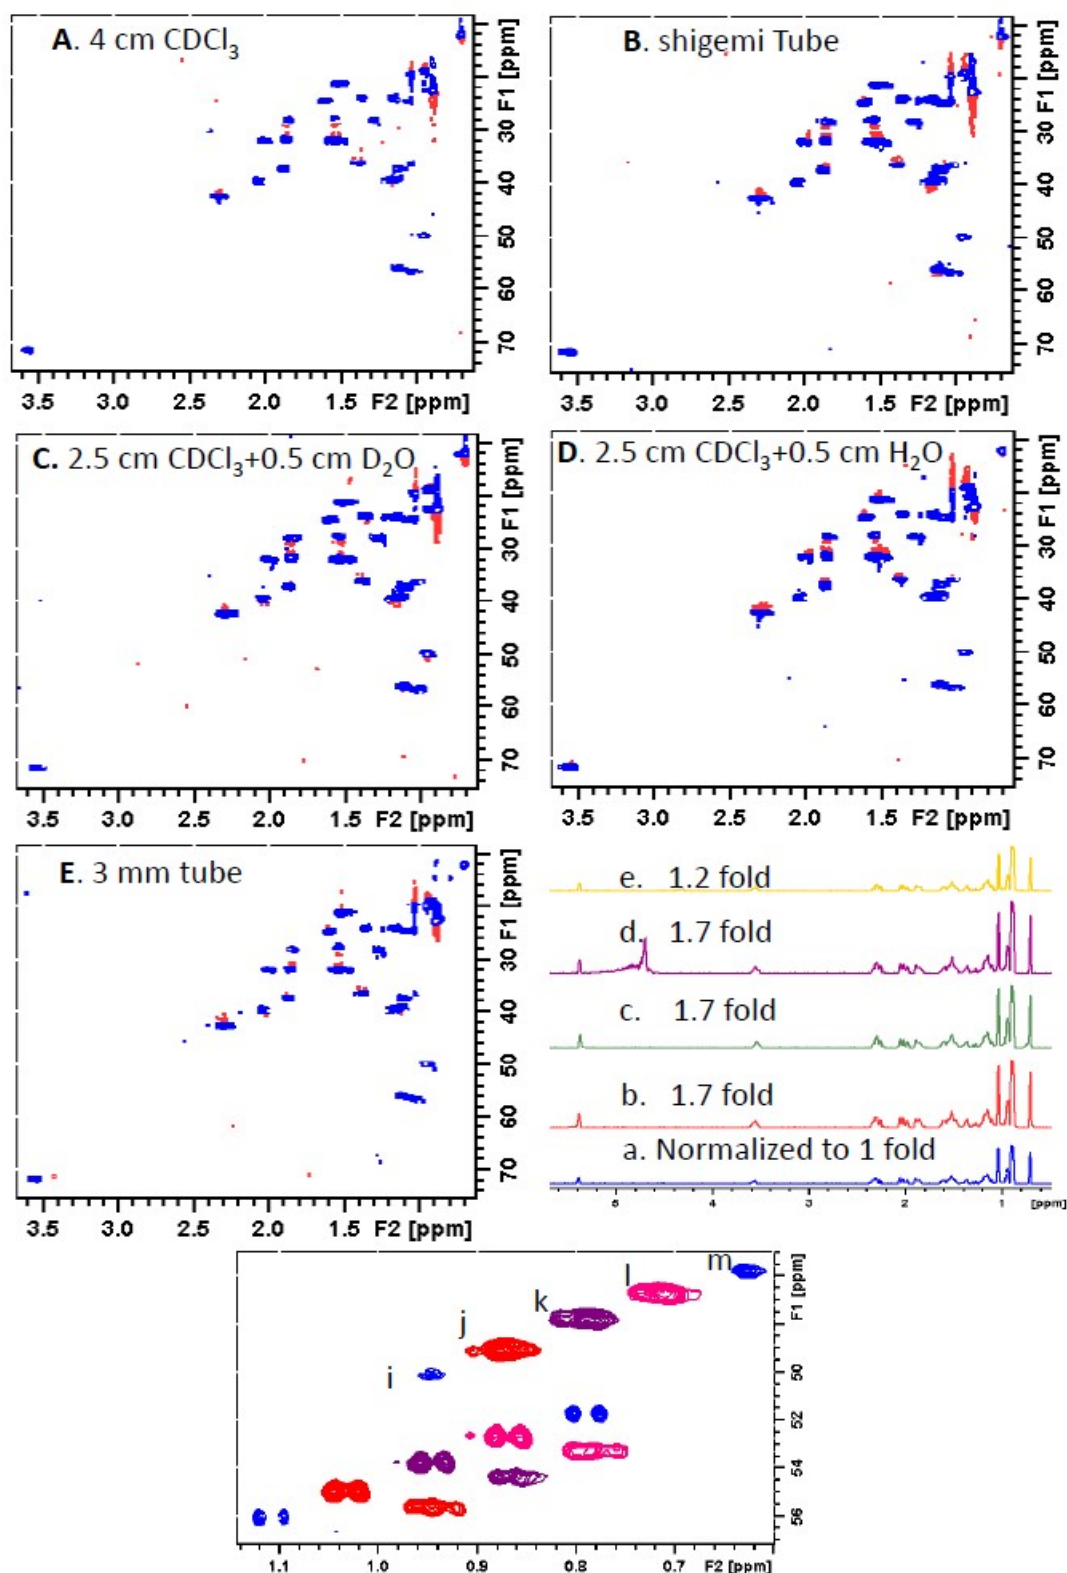

**Figure S4.** 2D  $^1\text{H}$ - $^{13}\text{C}$  HSQC spectra recorded on a sample of cholesterol (5.1 mg) using different sample types (A) standard sample-4 cm, (B) Shigemi tube, (C) biphasic-S 3 cm (2.5 cm  $\text{CDCl}_3 + 0.5$  cm  $\text{D}_2\text{O}$ ), (D) biphasic-S 3 cm (2.5 cm  $\text{CDCl}_3 + 0.5$  cm  $\text{H}_2\text{O}$ ), and (E) 3 mm o.d. tube respectively. All 2D  $^1\text{H}$ - $^{13}\text{C}$  HSQC spectra were recorded with the same acquisition and processing parameters. Signal to noise enhancement for the different sample types relative to the standard sample- 4 cm are shown

in the projections a, b, c, d, and e which are extracted from panels A-E respectively. The SNR enhancement was 1.7 fold for each of the shigemi tube, biphasic S-CDCl<sub>3</sub>/D<sub>2</sub>O, and biphasic S-CDCl<sub>3</sub>/H<sub>2</sub>O samples respectively relative the standard 4 cm sample. 3 mm o.d. tube displayed lower enhancement 1.2 fold compared to standard sample. All experiments were carried out at 400 MHz using BBFO probe. The experimental parameters and processing parameters are mentioned in SI table 1.

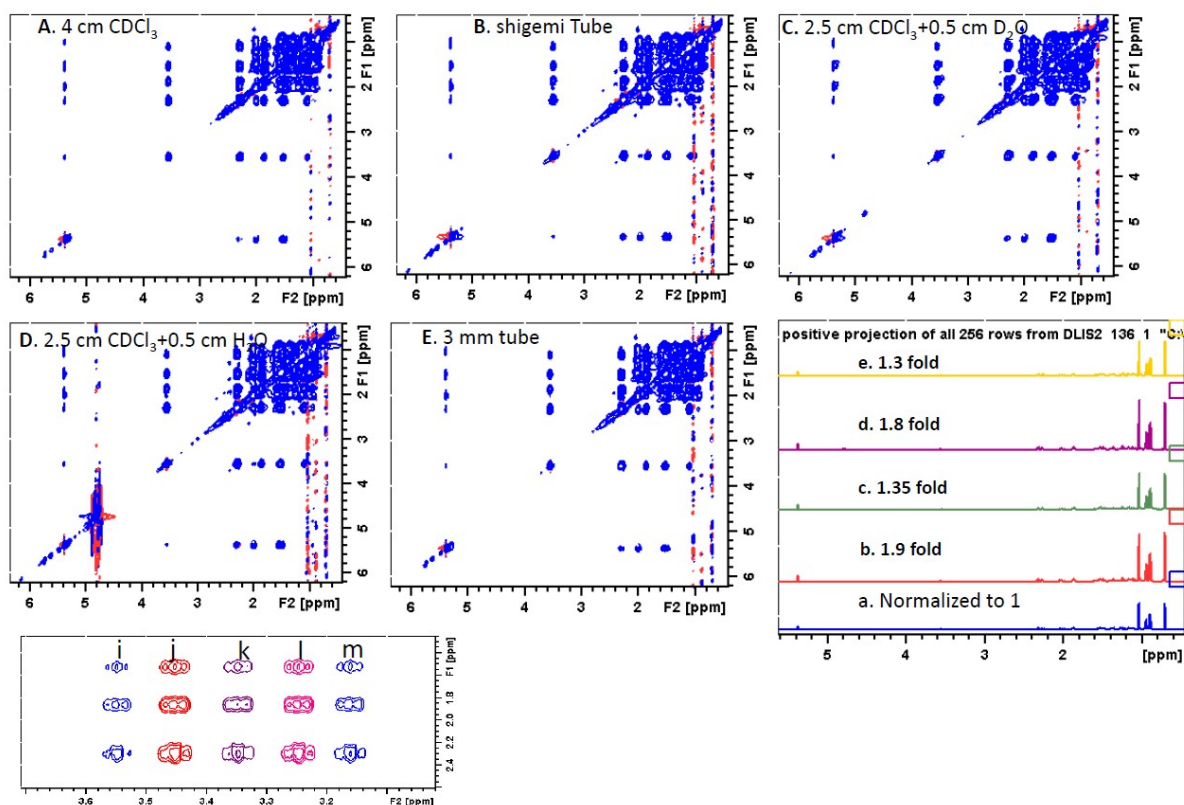

**Figure S5.** 2D <sup>1</sup>H-<sup>1</sup>H TOCSY spectra on a sample of cholesterol (5.1mg) for different sample types (A) standard sample-4 cm, (B) Shigemi tube, (C) biphasic-S 3 cm (2.5 cm CDCl<sub>3</sub>+0.5 cm D<sub>2</sub>O), (D) biphasic-S 3 cm (2.5 cm CDCl<sub>3</sub>+0.5 cm H<sub>2</sub>O), and (E) 3 mm o.d. tube respectively. All spectra were recorded with the same acquisition and processing parameters. The projections a-e are extracted from panels A-E and compares the enhancement in SNR for the different sample types relative to the standard sample- 4 cm. Shigemi tube shows highest SNR enhancement (1.9 fold) followed by biphasic-S CDCl<sub>3</sub>/H<sub>2</sub>O (1.8 fold), and biphasic-S CDCl<sub>3</sub>/D<sub>2</sub>O sample (1.35 fold) respectively. 3 mm o.d. tube sample displayed 1.3 fold gain in SNR compared to the standard sample (4 cm CDCl<sub>3</sub>). All experiments were carried out at 800 MHz using TCI cryoprobe. The experimental parameters and processing parameters are mentioned in SI table 1.



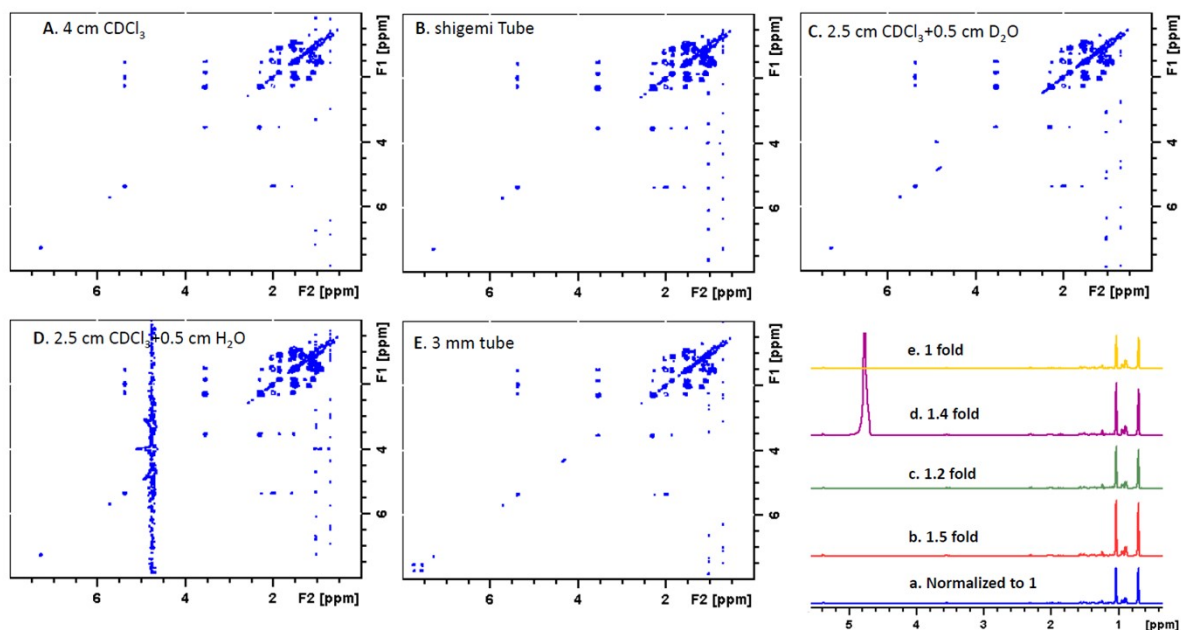

**Figure S6.** 2D  $^1\text{H}$ - $^1\text{H}$  COSY spectra on a sample of cholesterol (5.1 mg) on different sample types (A) standard sample-4 cm, (B) Shigemi tube, (C) biphasic-S 3 cm (2.5 cm  $\text{CDCl}_3$ +0.5 cm  $\text{D}_2\text{O}$ ), (D) biphasic-S 3 cm (2.5 cm  $\text{CDCl}_3$ +0.5 cm  $\text{H}_2\text{O}$ ), and (E) 3 mm o.d. tube respectively. The projections a, b, c, d, and e are extracted from the panels A-E respectively and compares the improved sensitivity for the different sample types relative to the standard sample- 4 cm. Highest SNR enhancement is observed for Shigemi tube (1.5 fold) followed by biphasic-S  $\text{CDCl}_3/\text{D}_2\text{O}$  (1.2 fold), and biphasic-S  $\text{CDCl}_3/\text{H}_2\text{O}$  sample (1.4 fold) respectively. Small diameter tube 3 mm o.d. displayed same SNR as the standard sample 4 cm  $\text{CDCl}_3$  in 5 mm o.d. tube. All spectra were recorded with the same acquisition and processing parameters. The experimental parameters and processing parameters are mentioned in SI table 1

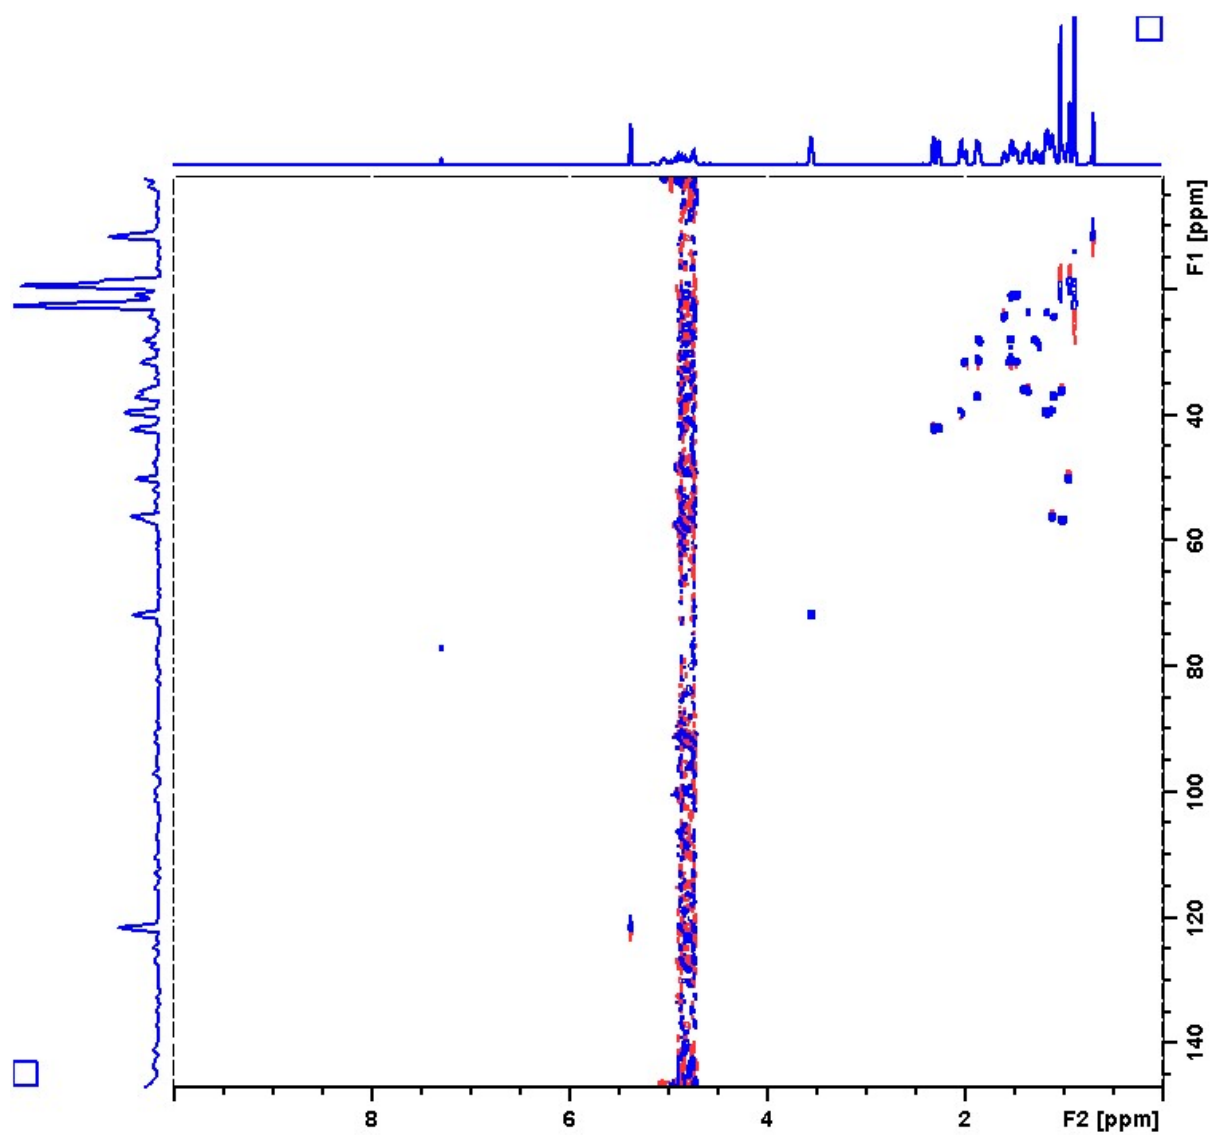

Fig S7. 800 MHz full hsqc spectrum of S-CDCl<sub>3</sub>/H<sub>2</sub>O symmetric cholesterol sample (5.1 mg)

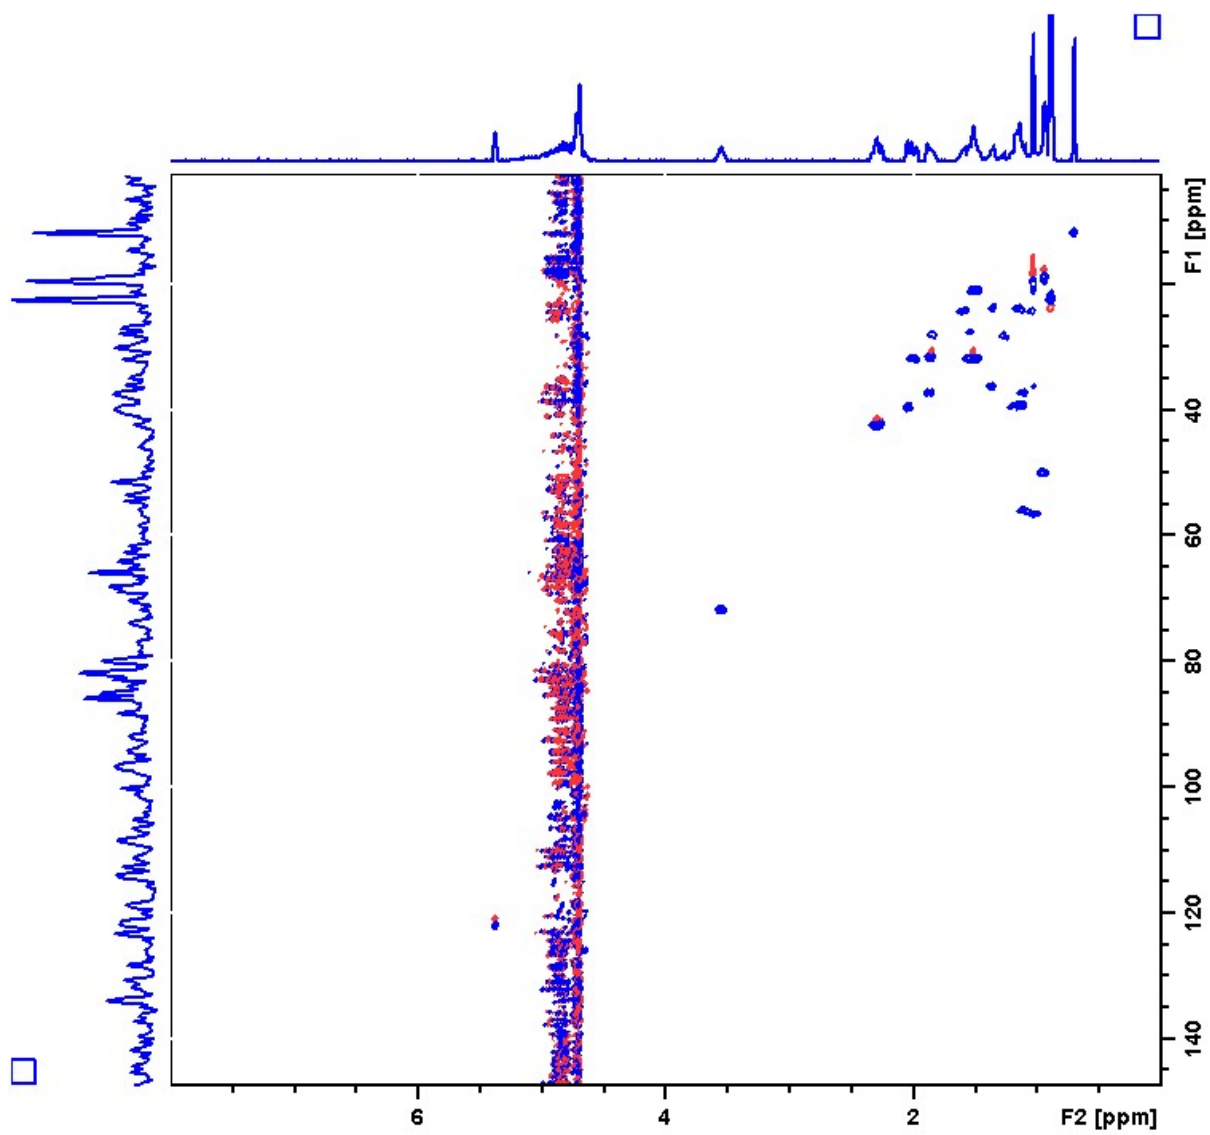

Fig S8. 400 MHz full hsqc spectrum of S-CDCl<sub>3</sub>/H<sub>2</sub>O cholesterol sample (5.1 mg)

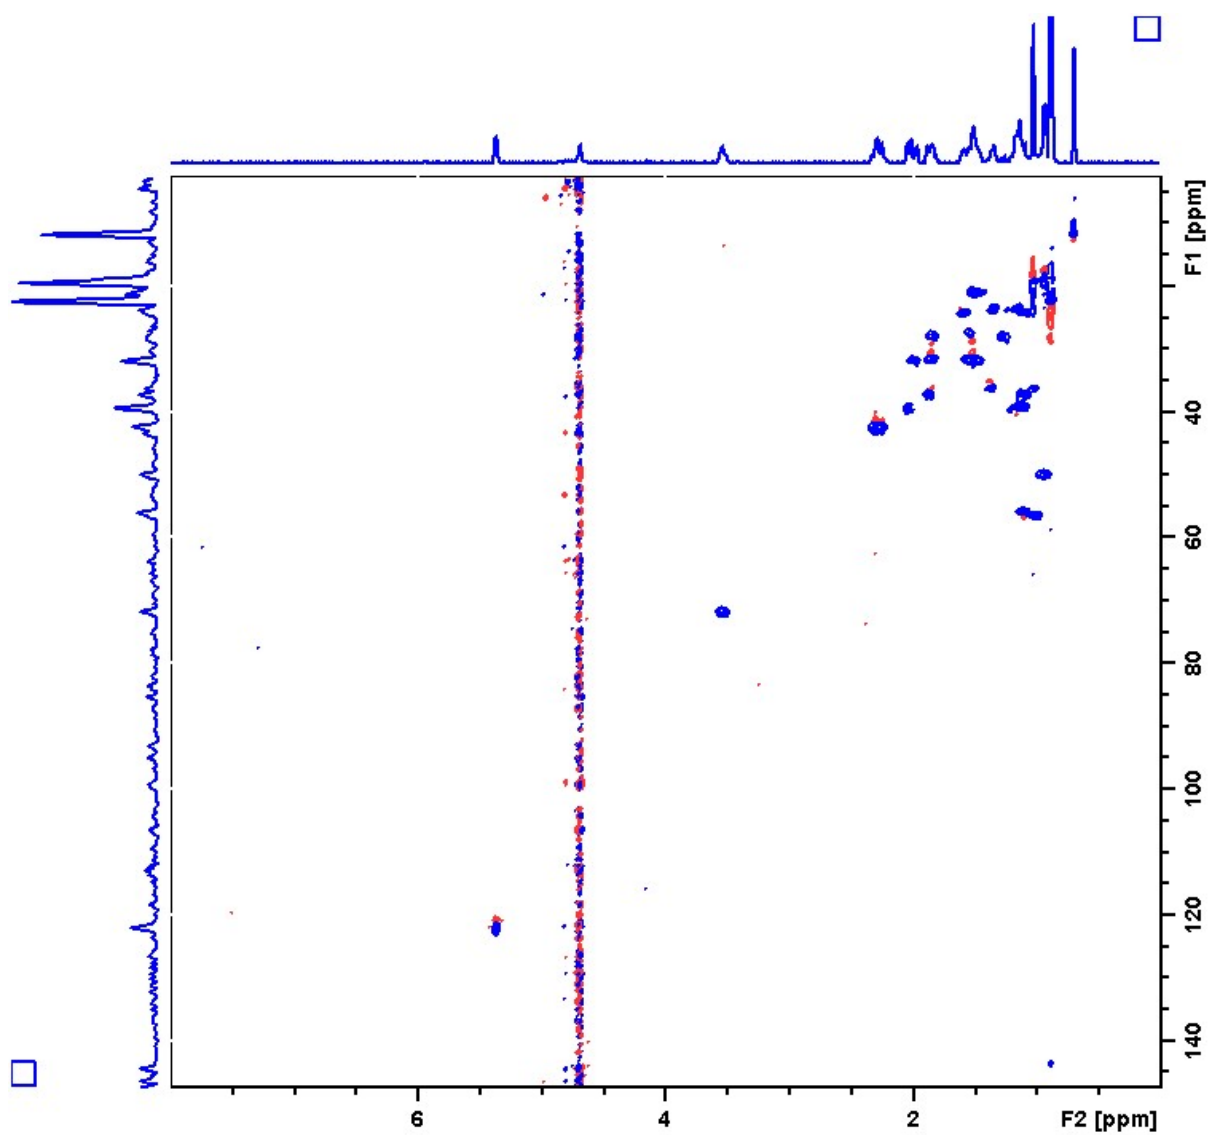

Fig S9. 400 MHz full hsqc spectrum of U-CDCl<sub>3</sub>/H<sub>2</sub>O cholesterol sample (5.1 mg). Small intensity of water peak is evident when compared to Figures S8 and S9 as the Unsymmetrical positioning pushes the water layer away from the receiver coil region.

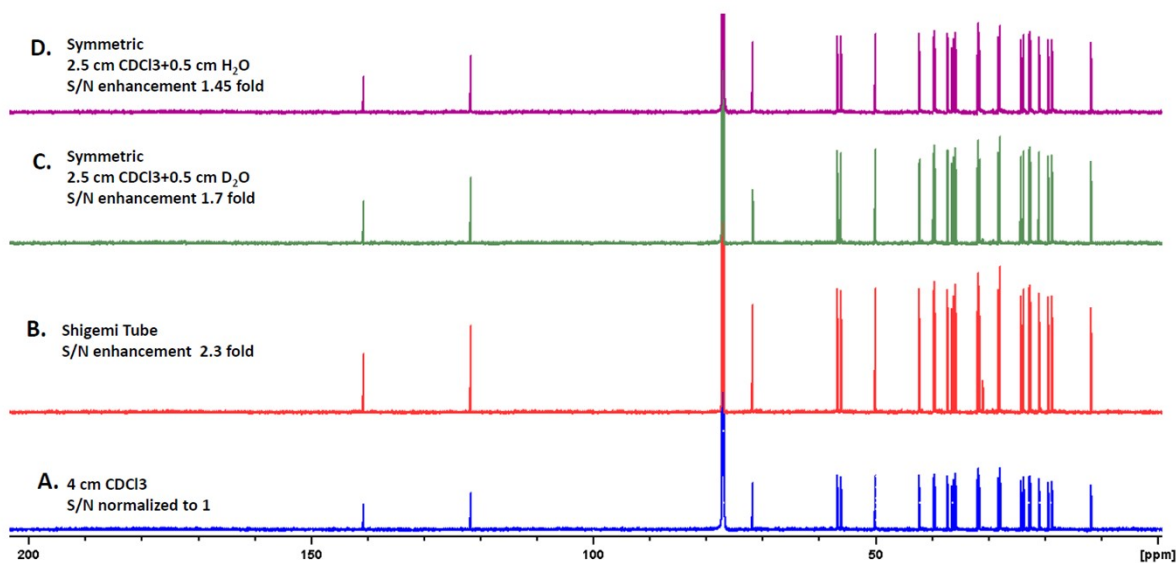

**Figure S10.** displays the comparison of  $^{13}\text{C}$  NMR spectra on second sample of cholesterol (5.9 mg) from 800 MHz at the same noise level for- (A) standard sample (4 cm), (B) Shigemi tube, (C) biphasic-S 3 cm (2.5 cm CDCl<sub>3</sub>+0.5 cm D<sub>2</sub>O), (D) biphasic-S 3 cm (2.5 cm CDCl<sub>3</sub>+0.5 cm H<sub>2</sub>O), and (E) 3 mm o.d. tube samples respectively. The spectra from Shigemi tube display SNR enhancement by a factor of 2.3 fold relative to the standard 4 cm sample. The biphasic-S CDCl<sub>3</sub>/D<sub>2</sub>O and biphasic-S CDCl<sub>3</sub>/H<sub>2</sub>O in 3C and 3D display SNR enhancement by a factor of 1.7 and 1.45 fold, respectively, relative to that from the standard sample. 3 mm o.d. tube displayed lower sensitivity 0.87 fold relative to the standard sample. The experimental parameters and processing parameters are kept same as in Figure 6 of the main manuscript and detailed in SI table 1.

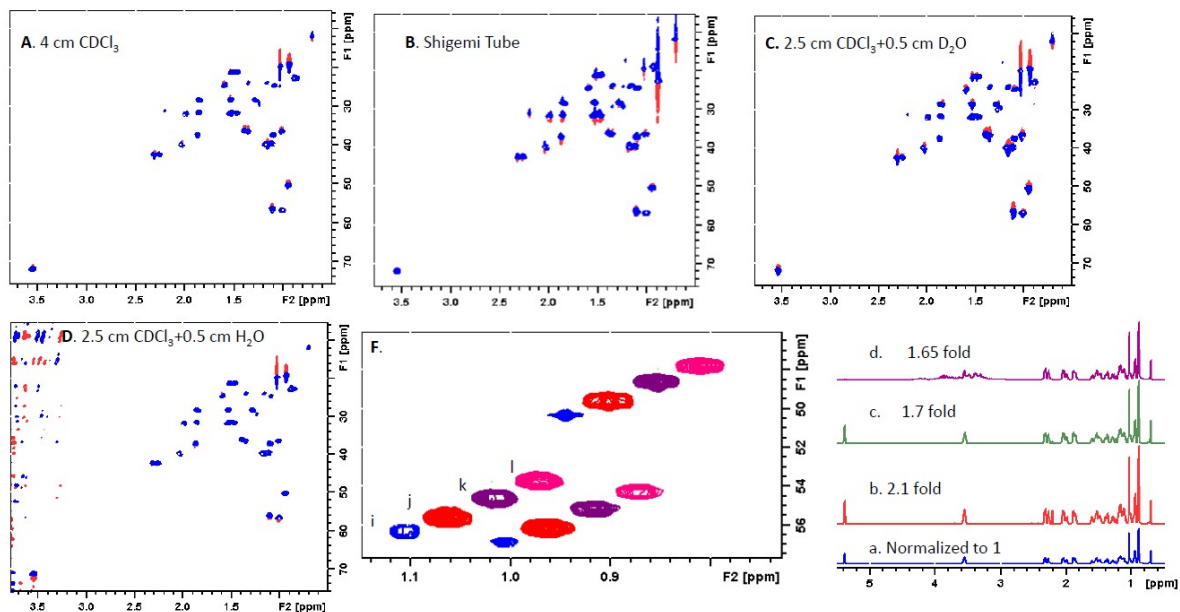

**Figure S11.** 2D  $^1\text{H}$ - $^{13}\text{C}$  HSQC spectra at 800 MHz on second sample of cholesterol (5.9 mg) on different sample types (A) standard sample-4 cm, (B) shigemi tube, (C) biphasic-S 3 cm (2.5 cm  $\text{CDCl}_3$ +0.5 cm  $\text{D}_2\text{O}$ ), (D) biphasic-S 3 cm (2.5 cm  $\text{CDCl}_3$ +0.5 cm  $\text{H}_2\text{O}$ ), and (E) 3 mm o.d. tube respectively. All 2D  $^1\text{H}$ - $^{13}\text{C}$  HSQC spectrum was recorded with the same acquisition and processing parameters. The projections a, b, c, d, and e compares the enhancement in signal to noise ratio for the different sample types relative to the standard sample- 4 cm. The enhancement is highest for shigemi tube (2.1 fold) followed by biphasic  $\text{CDCl}_3/\text{D}_2\text{O}$  (1.7 fold), and biphasic  $\text{CDCl}_3/\text{H}_2\text{O}$  sample (1.65) respectively. Small diameter tube 3 mm o.d. has lower sensitivity (0.85 fold) than standard sample. Panel F display comparison of the expanded and shifted cross-peaks plotted on same contour levels for standard- 4 cm (i), shigemi tube, biphasic-S ( $\text{CDCl}_3/\text{D}_2\text{O}$ ), biphasic-S ( $\text{CDCl}_3/\text{H}_2\text{O}$ ), and 3 mm o.d. tube samples respectively. The experimental parameters and processing parameters are kept same as in Figure 7 of the main manuscript and detailed in SI table 1.
